# Supplementary material for: A Healthy Diet Is Not More Expensive than Less Healthy Options: Cost-Analysis of Different Dietary Patterns in Mexican Children and Adolescents
Source: MDPI journal article supplement (doi:10.3390/nu13113871), 2021-10-29
Supplement: s1 [file s1]

Supplementary Table S1. Food grouping used in the dietary pattern analysis

| Main group | Basis for placing a food item | Food groups         | Food items                                                                                                                               |
|------------|-------------------------------|---------------------|------------------------------------------------------------------------------------------------------------------------------------------|
| Grains     | Culinary use                  | 1. Corn tortilla    | Corn tortilla.                                                                                                                           |
|            |                               | 2. Mexican food     | Pozole, memela, quesadilla, sope, taco.                                                                                                  |
|            | Proportion of fiber           | 3. Whole grains     | Whole bread, oatmeal, linseed, all Bran, multi bran, multigrain.                                                                         |
|            |                               | 4. Refined grains   | White bread, wheat tortilla, rice, corn flakes, honey crunch, other cereals.                                                             |
|            | Specific nutrient profile     | 5. Pastries         | Pastries.                                                                                                                                |
|            |                               | 6. Desserts         | Cookies, cakes.                                                                                                                          |
|            |                               | 7. Snacks           | Potato chips, crackers.                                                                                                                  |
| Vegetables | Proportion of fiber           | 8. Fresh vegetables | Cauliflower, spinach, lettuce, carrots, tomato, nopal, onion, corn, cabbage, pea, green bean, chili, hot pepper, beet, mixed vegetables. |
|            | Culinary use                  | 9. Tomato juice     | Tomato juice.                                                                                                                            |

|        |                           |                             |                                                                                                                                                                     |
|--------|---------------------------|-----------------------------|---------------------------------------------------------------------------------------------------------------------------------------------------------------------|
|        | Proportion of starch      | 10. Potatoes                | Potatoes.                                                                                                                                                           |
| Fruits | Proportion of fiber       | 11. Fresh Fruits            | Banana, prune, peach, apple, orange, avocado, grapes, strawberry, melon, watermelon, mango, tangerine, pear, mamey, zapote, papaya, pineapple, guava, prickly pear. |
|        | Frequency of consumption  | 12. Orange juice            | Orange juice.                                                                                                                                                       |
| Meats  | Frequency of consumption  | 13. Eggs                    | Eggs.                                                                                                                                                               |
|        |                           | 14. Poultry                 | Chicken with or without skin.                                                                                                                                       |
|        | Specific nutrient profile | 15. Red meat                | Pork, beef or lamb.                                                                                                                                                 |
|        |                           | 16. Processed meat          | Sausage, bacon, ham.                                                                                                                                                |
|        |                           | 17. Fish and other sea food | Canned tuna fish, sardine, fresh fish, octopus, and squid.                                                                                                          |
| Dairy  | Specific nutrient profile | 18. Low-fat dairy products  | Skim or low-fat milk, low-fat yogurt.                                                                                                                               |
|        | “proportion of fat”       | 19. High fat dairy products | Whole milk, chocolate milk, cream, high fat yogurt, cream                                                                                                           |

|                 |                                                               |                           |                                                                                 |
|-----------------|---------------------------------------------------------------|---------------------------|---------------------------------------------------------------------------------|
|                 |                                                               |                           | cheese, other cheese, ice cream.                                                |
| Legumes         | Frequency of consumption                                      | 20. Legumes               | Lentils, dry beans.                                                             |
| Fat             | Specific nutrient profile “proportion of fat and type of fat” | 21. Oils and nuts         | Peanut, walnut, almond, pistachios, vegetable oils.                             |
|                 |                                                               | 22. Butter                | Margarine, butter, mayonnaise, animal fats.                                     |
| Sugar           | Frequency of consumption “proportion of sugar”                | 23. Sweet food and sugars | Sugar, chocolate, candies, jam, honey, “ate”, jelly.                            |
|                 |                                                               | 24. Soft drinks           | Soft drinks.                                                                    |
|                 |                                                               | 25. Other sweetened       | Sweetened beverages.                                                            |
|                 |                                                               | 26. Low-energy drink      | Low-energy carbonated beverages.                                                |
| Alcohol         | Relative frequency of consumption                             | 27. Alcohol               | Coolers, spirit, wine, beer, brandy, whisky, tequila, rum, hard liquor, pulque. |
| Other beverages | Relative frequency of consumption                             | 28. Natural water         | Water.                                                                          |
|                 |                                                               | 29. Energetic drinks      | Gatorade and other energetic drinks.                                            |

Supplementary Table S2. Unit cost of the 133 foods in the food frequency questionnaire.

| Product                           | Purchase unit | Unit cost of product | Conversion of purchase unit to ration | Portion 4th edition SMAE | SMAE unit portion |
|-----------------------------------|---------------|----------------------|---------------------------------------|--------------------------|-------------------|
| Whole milk                        | 1L            | MX\$ 20.05           | 0.240                                 | 240                      | ml                |
| Skim milk                         | 1L            | MX\$ 20.10           | 0.240                                 | 240                      | ml                |
| Semi-skimmed milk                 | 1L            | MX\$ 20.50           | 0.240                                 | 240                      | ml                |
| Milk with sugar                   | 1L            | MX\$ 8.00            | 0.240                                 | 240                      | ml                |
| Cream cheese                      | 1Kg           | MX\$ 39.70           | 0.045                                 | 45                       | gr                |
| Oaxaca cheese                     | 1Kg           | MX\$ 173.80          | 0.030                                 | 30                       | gr                |
| Manchego cheese                   | 1Kg           | MX\$ 223.75          | 0.025                                 | 25                       | gr                |
| Sour cream                        | 1Kg           | MX\$ 13.55           | 0.015                                 | 15                       | ml                |
| Ice cream (with milk)             | 1L            | MX\$ 30.00           | 0.099                                 | 99                       | gr                |
| Sorbet (without milk)             | 1L            | MX\$ 18.00           | 0.040                                 | 40                       | gr                |
| Yoghurt                           | 1L            | MX\$ 25.63           | 0.227                                 | 227                      | gr                |
| Danone/danonino                   | 1L            | MX\$ 35.50           | 0.250                                 | 250                      | gr                |
| Fermented products (Yakult, etc.) | 1L            | MX\$ 70.00           | 0.240                                 | 240                      | ml                |
| Margarine                         | 1L            | MX\$ 57.00           | 0.004                                 | 4                        | gr                |
| Butter                            | 1L            | MX\$ 115.66          | 0.006                                 | 6                        | gr                |
| Egg                               | 1Kg           | MX\$ 36.70           | 0.050                                 | 50                       | gr                |

|                           |     |             |       |    |    |
|---------------------------|-----|-------------|-------|----|----|
| Chicken                   | 1Kg | MX\$ 39.90  | 0.040 | 40 | gr |
| Bacon                     | 1Kg | MX\$ 223.50 | 0.008 | 8  | gr |
| Sausage                   | 1Kg | MX\$ 90.00  | 0.061 | 61 | gr |
| Ham                       | 1L  | MX\$ 123.00 | 0.042 | 42 | gr |
| Liver                     | 1L  | MX\$ 46.90  | 0.030 | 30 | gr |
| Chorizo (pork sausage)    | 1L  | MX\$ 64.00  | 0.015 | 15 | gr |
| Beef                      | 1L  | MX\$ 139.00 | 0.030 | 30 | gr |
| Pork meat                 | 1L  | MX\$ 80.00  | 0.040 | 40 | gr |
| Tuna                      | 1L  | MX\$ 154.00 | 0.033 | 33 | gr |
| Sardine                   | 1L  | MX\$ 137.00 | 0.036 | 36 | gr |
| Fish                      | 1L  | MX\$ 644.00 | 0.040 | 40 | gr |
| Octopus                   | 1L  | MX\$ 124.63 | 0.025 | 25 | gr |
| Pork rind                 | 1L  | MX\$ 154.50 | 0.012 | 12 | gr |
| Barbacoa (barbecued lamb) | 1L  | MX\$ 450.00 | 0.050 | 50 | gr |
| Turkey breast             | 1Kg | MX\$ 196.75 | 0.032 | 32 | gr |
| Pork ham                  | 1Kg | MX\$ 187.00 | 0.042 | 42 | gr |
| Mayonnaise                | 1Kg | MX\$ 64.10  | 0.005 | 5  | gr |
| Oil                       | 1L  | MX\$ 36.00  | 0.005 | 5  | ml |
| Lard                      | 1kg | MX\$ 35.50  | 0.004 | 4  | gr |

|                |     |             |       |     |    |
|----------------|-----|-------------|-------|-----|----|
| Cauliflower    | 1kg | MX\$ 33.50  | 0.200 | 200 | gr |
| Corn           | 1kg | MX\$ 38.50  | 0.083 | 83  | gr |
| Potato         | 1kg | MX\$ 24.00  | 0.095 | 95  | gr |
| Spinach        | 1kg | MX\$ 120.00 | 0.120 | 120 | gr |
| Calabazas      | 1kg | MX\$ 20.70  | 0.110 | 110 | gr |
| Lettuce        | 1kg | MX\$ 42.50  | 0.141 | 141 | gr |
| Tomato         | 1kg | MX\$ 23.30  | 0.120 | 120 | gr |
| Tomato puree   | 1kg | MX\$ 20.00  | 0.122 | 122 | gr |
| Cactus         | 1kg | MX\$ 20.20  | 0.140 | 140 | gr |
| Avocado        | 1kg | MX\$ 27.90  | 0.058 | 58  | gr |
| Pumpkin flower | 1kg | MX\$ 40.60  | 0.132 | 132 | gr |
| Beet           | 1kg | MX\$ 17.50  | 0.043 | 43  | gr |
| Onion          | 1kg | MX\$ 38.10  | 0.058 | 58  | gr |
| Green bean     | 1kg | MX\$ 36.60  | 0.063 | 63  | gr |
| Pea            | 1kg | MX\$ 71.60  | 0.053 | 53  | gr |
| Broad bean     | 1kg | MX\$ 25.00  | 0.032 | 32  | gr |
| Lentil         | 1kg | MX\$ 20.00  | 0.035 | 35  | gr |
| Bean           | 1Kg | MX\$ 34.00  | 0.035 | 35  | gr |
| Vegetable soup | 1L  | MX\$ 15.00  | 0.240 | 240 | ml |

|              |     |      |       |       |     |    |
|--------------|-----|------|-------|-------|-----|----|
| Salsa        | 1L  | MX\$ | 33.00 | 0.115 | 115 | gr |
| Pepper       | 1Kg | MX\$ | 25.00 | 0.040 | 40  | gr |
| Chickpea     | 1Kg | MX\$ | 27.00 | 0.035 | 35  | gr |
| White bean   | 1Kg | MX\$ | 42.00 | 0.035 | 35  | gr |
| Banana       | 1Kg | MX\$ | 20.00 | 0.080 | 80  | gr |
| Plum         | 1Kg | MX\$ | 55.70 | 0.198 | 198 | gr |
| Peach        | 1Kg | MX\$ | 65.50 | 0.174 | 174 | gr |
| Apple        | 1Kg | MX\$ | 49.00 | 0.138 | 138 | gr |
| Orange       | 1Kg | MX\$ | 14.00 | 0.242 | 242 | gr |
| Orange juice | 1L  | MX\$ | 21.00 | 0.120 | 120 | ml |
| Grape        | 1Kg | MX\$ | 57.50 | 0.126 | 126 | gr |
| Strawberry   | 1Kg | MX\$ | 65.30 | 0.204 | 204 | gr |
| Melon        | 1Kg | MX\$ | 16.95 | 0.271 | 271 | gr |
| Watermelon   | 1Kg | MX\$ | 8.00  | 0.160 | 160 | gr |
| Mango        | 1kg | MX\$ | 53.50 | 0.207 | 207 | gr |
| Tangerine    | 1kg | MX\$ | 16.50 | 0.180 | 180 | gr |
| Pear         | 1kg | MX\$ | 30.50 | 0.095 | 95  | gr |
| Mamey        | 1kg | MX\$ | 37.00 | 0.137 | 137 | gr |
| Tuna         | 1kg | MX\$ | 13.50 | 0.250 | 250 | gr |

|                            |     |      |        |       |     |    |
|----------------------------|-----|------|--------|-------|-----|----|
| Zapote                     | 1kg | MX\$ | 38.15  | 0.056 | 56  | gr |
| Papaya                     | 1kg | MX\$ | 23.90  | 0.140 | 140 | gr |
| Pineapple                  | 1kg | MX\$ | 14.85  | 0.124 | 124 | gr |
| Guava                      | 1kg | MX\$ | 25.50  | 0.135 | 135 | gr |
| Raisin                     | 1Kg | MX\$ | 102.00 | 0.020 | 20  | gr |
| Peanut                     | 1kg | MX\$ | 54.50  | 0.012 | 12  | gr |
| Nut                        | 1kg | MX\$ | 155.00 | 0.009 | 9   | gr |
| Almond                     | 1kg | MX\$ | 130.00 | 0.012 | 12  | gr |
| Cake                       | 1kg | MX\$ | 38.00  | 0.028 | 28  | gr |
| Pastries                   | 1kg | MX\$ | 55.00  | 0.017 | 17  | gr |
| Cookie                     | 1kg | MX\$ | 112.00 | 0.021 | 21  | gr |
| Chocolate                  | 1kg | MX\$ | 56.00  | 0.015 | 15  | gr |
| Jam                        | 1kg | MX\$ | 76.50  | 0.017 | 17  | gr |
| Corn tortilla              | 1kg | MX\$ | 15.00  | 0.030 | 30  | gr |
| Flour tortilla             | 1Kg | MX\$ | 39.25  | 0.028 | 28  | gr |
| Bread roll                 | 1kg | MX\$ | 55.00  | 0.020 | 20  | gr |
| Sandwich bread             | 1Kg | MX\$ | 34.75  | 0.027 | 27  | gr |
| Whole-grain sandwich bread | 1kg | MX\$ | 35.25  | 0.025 | 25  | gr |
| Cracker                    | 1Kg | MX\$ | 38.00  | 0.016 | 16  | gr |
| Rice                       | 1kg | MX\$ | 38.00  | 0.020 | 20  | gr |



|                                   |     |             |       |     |    |
|-----------------------------------|-----|-------------|-------|-----|----|
| Oatmeal                           | 1Kg | MX\$ 21.00  | 0.020 | 20  | gr |
| Pasta soup                        | 1kg | MX\$ 46.00  | 0.050 | 50  | gr |
| Fried foods                       | 1Kg | MX\$ 115.00 | 0.019 | 19  | gr |
| Al pastor tacos                   | 1Kg | MX\$ 190.00 | 0.150 | 150 | gr |
| Memela,<br>quesadilla, etc.       | 1Kg | MX\$ 35.00  | 0.150 | 150 | gr |
| Pozole                            | 1L  | MX\$ 55.00  | 0.310 | 31  | gr |
| Bran                              | 1Kg | MX\$ 35.00  | 0.054 | 54  | gr |
| Boxed cereal                      | 1Kg | MX\$ 55.60  | 0.015 | 15  | gr |
| Cola drink                        | 1L  | MX\$ 13.00  | 0.092 | 92  | ml |
| Flavored soda                     | 1L  | MX\$ 13.00  | 0.089 | 89  | ml |
| Diet soda                         | 1L  | MX\$ 13.00  | 0.355 | 355 | ml |
| Fruit “agua fresca”<br>with sugar | 1L  | MX\$ 15.00  | 0.500 | 500 | ml |
| Sugarless cup of<br>tea           | 1L  | MX\$ 10.00  | 0.240 | 240 | ml |
| Sugarless cup of<br>coffee        | 1L  | MX\$ 24.50  | 0.240 | 240 | ml |
| Atole cup with<br>milk            | 1L  | MX\$ 22.00  | 0.240 | 240 | ml |
| Atole cup without<br>milk         | 1L  | MX\$ 22.00  | 0.240 | 240 | ml |
| Cup of chocolate<br>with milk     | 1L  | MX\$ 22.00  | 0.240 | 240 | ml |
| Cup of chocolate<br>without milk  | 1L  | MX\$ 22.00  | 0.240 | 240 | ml |

|                                                 |    |             |       |     |    |
|-------------------------------------------------|----|-------------|-------|-----|----|
| Glass of wine                                   | 1L | MX\$ 175.00 | 0.200 | 200 | ml |
| Cup of beer                                     | 1L | MX\$ 24.00  | 0.356 | 356 | ml |
| Alcohol                                         | 1L |             |       |     |    |
| Alcoholic drink (liquor)                        | 1L | MX\$ 60.00  |       | 55  | ml |
| Natural fruit juice                             | 1L | MX\$ 19.50  | 0.080 | 80  | ml |
| Industrialized fruit juice                      | 1L | MX\$ 18.35  | 0.125 | 125 | ml |
| Vegetable juice                                 | 1L | MX\$ 39.95  | 0.121 | 121 | ml |
| Industrialized vegetable juice                  | 1L | MX\$ 20.00  | 0.125 | 125 | ml |
| Natural water                                   | 1L | MX\$ 12.00  | 0.240 | 240 | ml |
| Mineral water                                   | 1L | MX\$ 13.50  | 0.240 | 240 | ml |
| Tea with sugar (industrialized)                 | 1L | MX\$ 25.00  | 0.240 | 240 | ml |
| Tea with non-caloric sweetener (industrialized) | 1L | MX\$ 27.50  | 0.240 | 240 | ml |
| Coffee with sugar                               | 1L | MX\$ 24.50  | 0.240 | 240 | ml |
| Coffee with non-caloric sweetener               | 1L | MX\$ 24.50  | 0.240 | 240 | ml |
| Agua fresca with sugar                          | 1L | MX\$ 25.00  | 0.240 | 240 | ml |
| Agua fresca with non-caloric sweetener          | 1L | MX\$ 18.35  | 0.240 | 240 | ml |
| Industrialized water with sugar                 | 1L | MX\$ 18.35  | 0.240 | 240 | ml |

|                                  |    |            |       |     |    |
|----------------------------------|----|------------|-------|-----|----|
| Non-caloric industrialized water | 1L | MX\$ 18.00 | 0.240 | 240 | ml |
| Sports drink                     | 1L | MX\$ 18.35 | 0.152 | 240 | ml |
| Energetic drink                  | 1L | MX\$ 18.35 | 0.078 | 78  | ml |
| Sugarless frappé                 | 1L | MX\$ 45.00 | 0.240 | 240 | ml |
| Sugar frappé                     | 1L | MX\$ 45.00 | 0.240 | 240 | ml |

MX= Mexican peso.
